# Supplementary material
Source: PubMed Central journal article supplement (PMC5599305)
Supplement: NIHMS835435-supplement-4.pdf [file NIHMS835435-supplement-4.pdf]

Supplemental Table S1. FMO3 Splicing assay primers

| Primer name               | sequence                  |
|---------------------------|---------------------------|
| Exon 2 Forward            | CCATCATTGGAGCTGGTGTGAG    |
| Exon 2-4 Boundary Reverse | ATTTACTGGATACAAATGTTGAAA  |
| Exon 3-4 Boundary Reverse | TGTTTATTTACTGGATACAAATGTC |
| Exon 7-8 Boundary Forward | GGCAAAGTACAAGTTCCTTT      |
| Exon 6-8 Boundary Forward | GGCAAAGTACAAGTTCCTTT      |
| Exon 9 Reverse            | TTGCCCAATGAAGGAGGAGAG     |

Supplemental Table S2. FMO3 haplotypes in subjects with measured D<sub>2</sub>-nicotine-N-oxide

| FMO3 haplotype | rs1800822 | rs2266782 (E158K) | rs1736557 (V257M) | rs909530 | rs2266780 (E308G) | n alleles | %    |
|----------------|-----------|-------------------|-------------------|----------|-------------------|-----------|------|
| 1              | C         | G                 | G                 | C        | A                 | 145       | 42.6 |
| 2              | C         | A                 | G                 | C        | A                 | 78        | 22.9 |
| 3              | C         | A                 | G                 | T        | G                 | 61        | 17.9 |
| 4              | C         | G                 | A                 | C        | A                 | 35        | 10.3 |
| 5              | T         | G                 | G                 | T        | A                 | 19        | 5.6  |
| 6              | T         | G                 | G                 | C        | A                 | 1         | 0.3  |
| 7              | C         | G                 | G                 | T        | A                 | 1         | 0.3  |

Polymorphic sites analyzed are given at the top of each column by rs number and amino acid changes when relevant. Haplotypes are ordered by frequency.

Supplemental Table S3. Kinetic parameters for recombinant FMO3 mediated *trans*-nicotine N-oxidation

| Enzyme                   | $k_{cat}$ (min <sup>-1</sup> ) | $K_m$ (mM)  | $k_{cat}/K_m$ (min <sup>-1</sup> mM <sup>-1</sup> ) |
|--------------------------|--------------------------------|-------------|-----------------------------------------------------|
| Reference                | 70.8 ± 1.1                     | 1.11 ± 0.05 | 63.6 ± 2.8                                          |
| 158K                     | 99.6 ± 2.2                     | 1.26 ± 0.07 | 51.1 ± 3.6                                          |
| 308G                     | 51.8 ± 1.2                     | 1.01 ± 0.07 | 69.0 ± 4.7                                          |
| 158K/308G                | 79.1 ± 1.9                     | 1.15 ± 0.07 | 78.9 ± 4.7                                          |
| (Reference) <sup>a</sup> | 124.7 ± 5.6                    | 1.38 ± 0.15 | 90.1 ± 10.8                                         |

<sup>a</sup> Corning Supersomes
